# Supplementary material for: Surfactin and Spo0A-Dependent Antagonism by Bacillus subtilis Strain UD1022 against Medicago sativa Phytopathogens
Source: MDPI journal article supplement (doi:10.3390/plants12051007), 2023-02-23
Supplement: s1 [file s1]

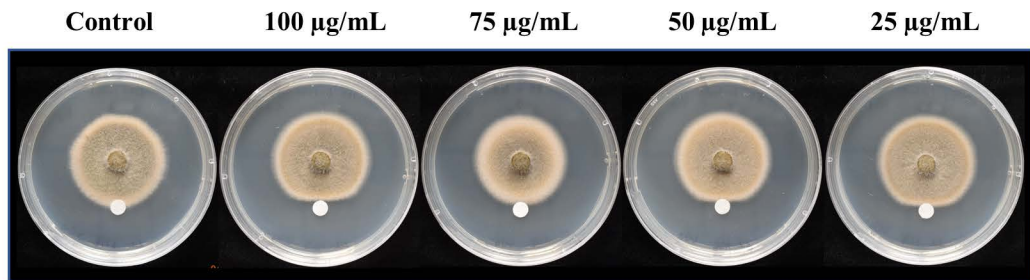

**Supplementary Figure S1.** Surfactin disk challenge of *A. medicaginicola* StC 306-5. Surfactin mildly but not significantly antagonized StC 306-5 colonies at 25 and 100 g/ml.

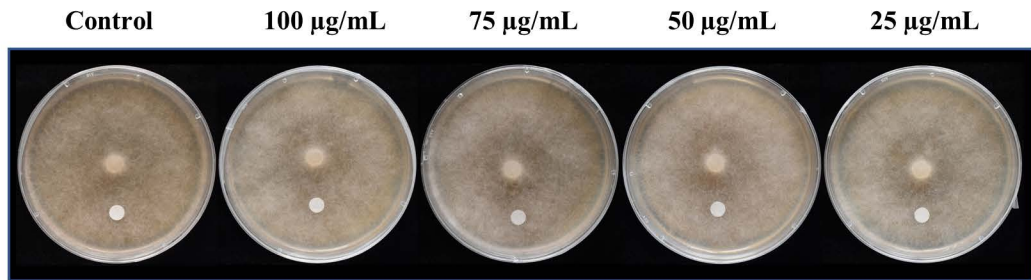

**Supplementary Figure S2.** Surfactin disk challenge of *Phytophthora medicaginis* A2A1. Direct application of surfactin had no effect on A2A1 growth at 25 µg/ml to 100 µg/ml.

**Supplementary Table S1.** *B. subtilis* UD1022 Mutants. Bacterial strains used in this study.

| <b>Strain</b>            | <b>Genotype</b>                                 |
|--------------------------|-------------------------------------------------|
| UD1022 <i>spo0A</i>      | <i>spo0A::erm</i>                               |
| UD1022 <i>sinI</i>       | <i>sinI::spc</i>                                |
| 1022 <i>eps tasA</i>     | <i>eps::tet</i><br><i>tasA::erm</i>             |
| UD1022 <i>srfAC</i>      | <i>srfAC::erm</i>                               |
| UD1022 <i>sfp</i>        | <i>sfp::erm</i>                                 |
| UD1022 <i>ppsB</i>       | $\Omega$ <i>tn10::spec</i>                      |
| UD1022 <i>ppsB srfAC</i> | $\Omega$ <i>tn10::spec</i><br><i>srfAC::erm</i> |
